# Supplementary material
Source: PubMed Central journal article supplement (PMC7854515)
Supplement: NIHMS1652599-supplement-1.pdf [file NIHMS1652599-supplement-1.pdf]

Supplemental Figure 1

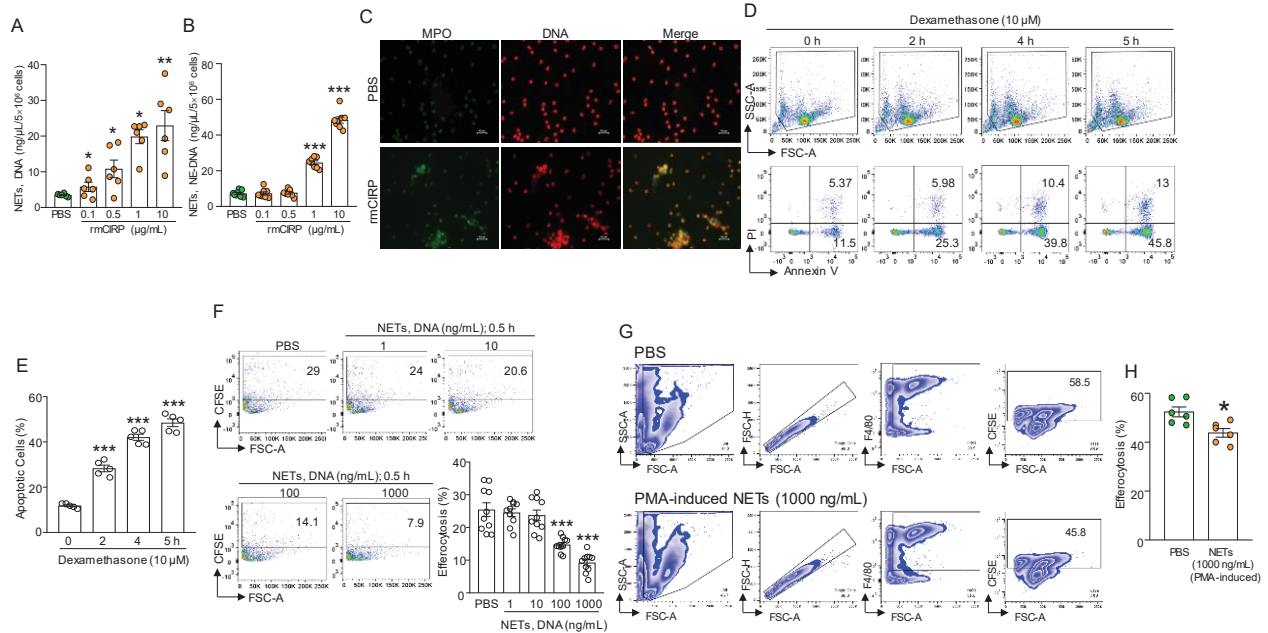

**Supplemental Figure 1: (A-C) eCIRP induces NET formation.** A total of  $1 \times 10^6$  BMDN were stimulated with various doses of rmCIRP for 4 h. **(A)** NETs were extracted and DNA concentrations in NETs were expressed as ng/μL/5 × 10<sup>6</sup> cells. **(B)** Extracted NETs were loaded in anti-NE-coated plates and reacted with anti-DNA-POD Abs. NETs contents in terms of the presence of NE-DNA complex were assessed by ELISA. Data were obtained from 3 independent experiments and expressed as means ± SE (n=6-8 samples/group). The groups were compared by one-way ANOVA and SNK method. \*p<0.05, \*\*p<0.01, \*\*\*p<0.001 vs. PBS group. **(C)** NETs assay by microscope. A total of  $1 \times 10^6$  BMDN were plated in 24-well plate and stimulated with PBS or rmCIRP (1 μg/mL). After 4 h of incubation, cells adhered into the plate were fixed with 2% PFA and stained with FITC-labeled anti-MPO Ab (green) and sytox orange (red) and viewed under fluorescent microscope at ×400 original magnification. Scale bar: 40 μm. **(D, E) Induction of thymocyte apoptosis.** A total of  $1 \times 10^7$  thymocytes were plated in 10-cm petri dish and stimulated with dexamethasone (10 μM) for various time-points. Apoptosis was determined by flow cytometry. At 5 h time point, 45.8% of the thymocytes were early apoptotic (Annexin V<sup>+</sup> PI<sup>-</sup>), around 13% of the cells were late apoptotic (Annexin V<sup>+</sup> PI<sup>+</sup>) giving rise to about 58.8% total apoptotic cells. Data were obtained from 3 independent experiments and expressed as means ± SE (n=5 samples/group). The groups were compared by one-way ANOVA and SNK method. \*\*\*p<0.001 vs. 0 h control. PI, propidium iodide. **(F) eCIRP-induced NETs inhibit efferocytosis at 0.5 h of co-culture.** A total of  $5 \times 10^5$  peritoneal macrophages were cultured with  $1.5 \times 10^6$  CFSE-labeled apoptotic cells in presence with PBS or various concentrations of NETs. After 0.5 h of incubation, cells were washed, fixed with 2% PFA and efferocytosis was assessed by using flow cytometry. Efferocytosis was determined as the percentage of CFSE-positive cells present in F4/80<sup>+</sup> macrophages. Data were obtained from 3 independent experiments and expressed as means ± SE (n=10 samples/group). The groups were compared by one-way ANOVA and SNK method (\*\*\*p<0.001 vs. PBS-treated group). **(G, H) PMA-induced NETs inhibit efferocytosis.** **(G, H)** A total of  $5 \times 10^5$  peritoneal macrophages were cultured with  $1.5 \times 10^6$  CFSE-labeled apoptotic cells in presence with PBS or PMA (50 nM)-induced NETs (1000 ng/mL). After 1 h of incubation, cells were washed, fixed with 2% PFA, and efferocytosis was assessed by flow cytometry. Efferocytosis was determined as the percentage of CFSE-positive cells present in F4/80<sup>+</sup> macrophages. Data were expressed as means ± SE (n=6 samples/group). The groups were compared by Student's t-test (\*p<0.05 vs. PBS-treated group). PMA, phorbol 12-myristate 13-acetate.

Supplemental Figure 2 Gating Strategies of Original Representative Figures

A

(original Fig 2A gating)

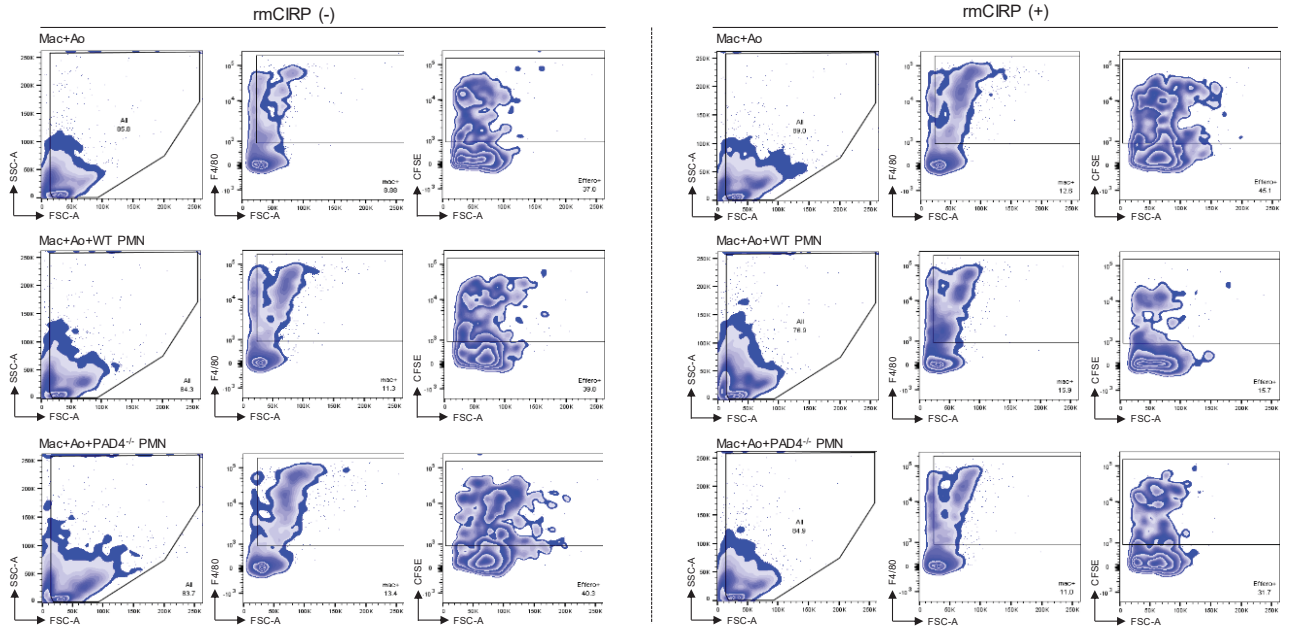

B

(original Fig 2E gating)

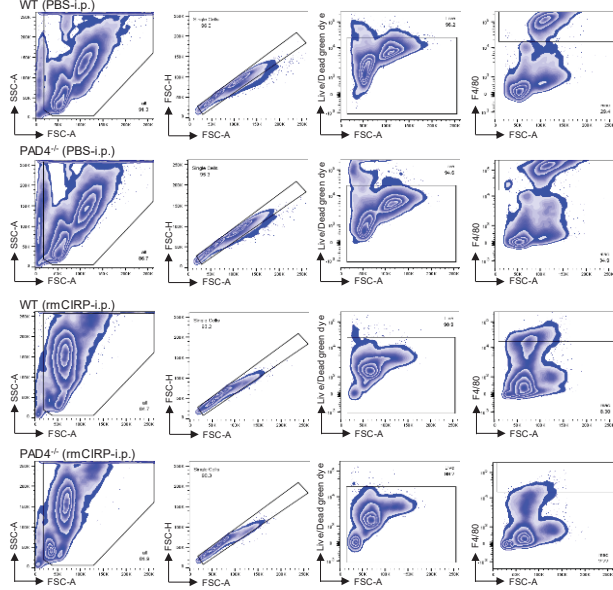

(original Fig 2H gating)

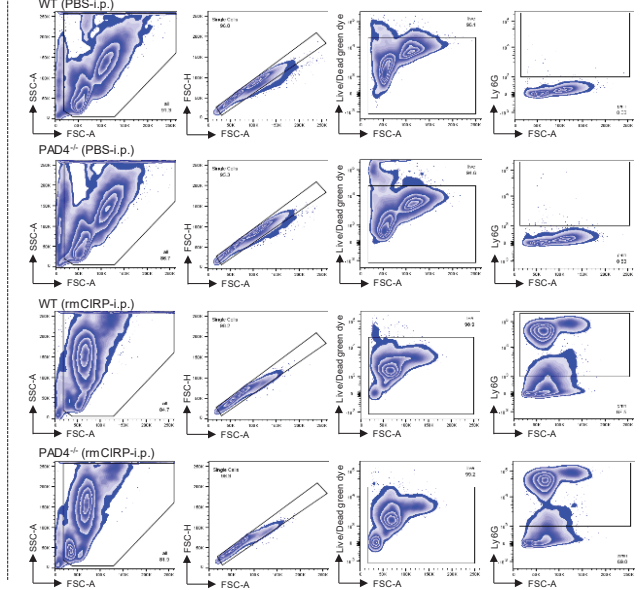

C

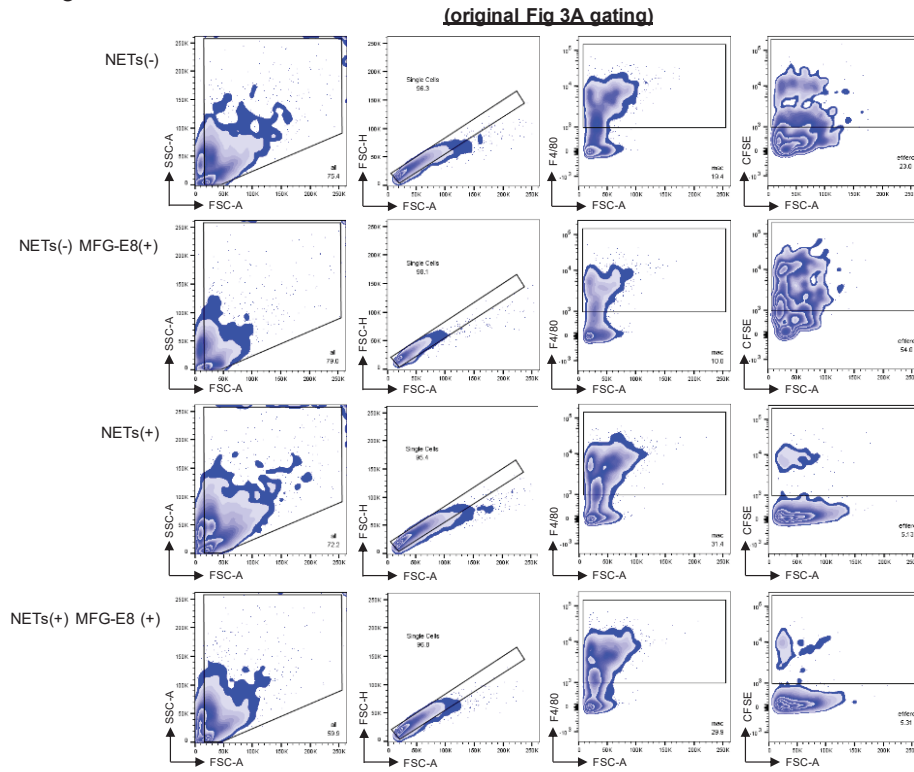

D

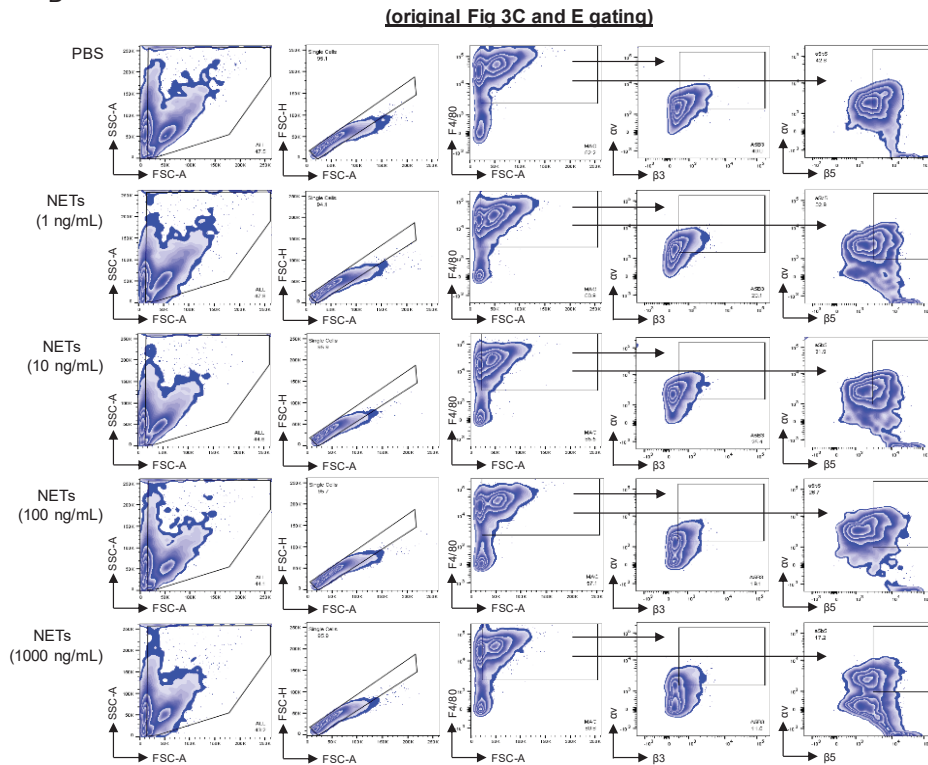

E

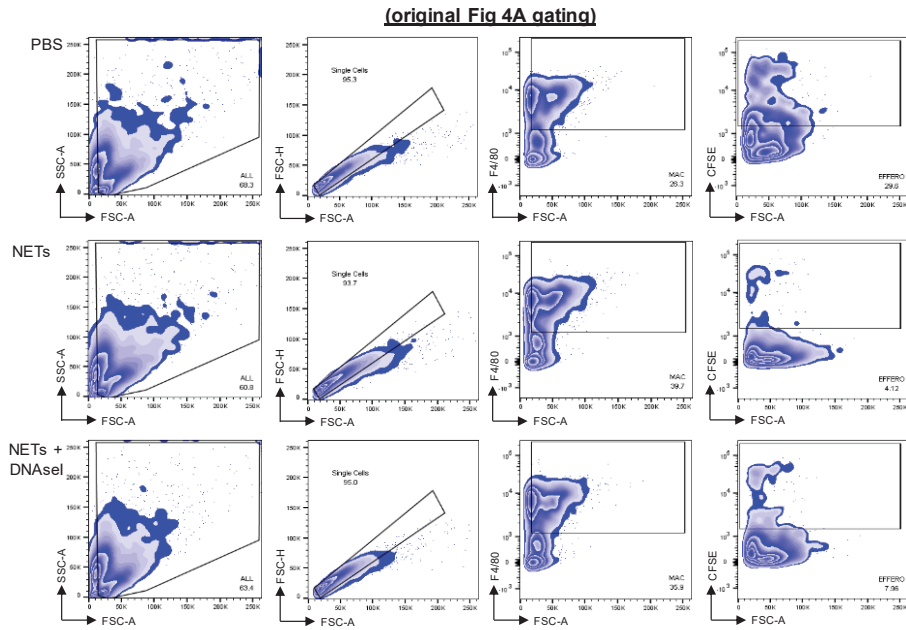

F

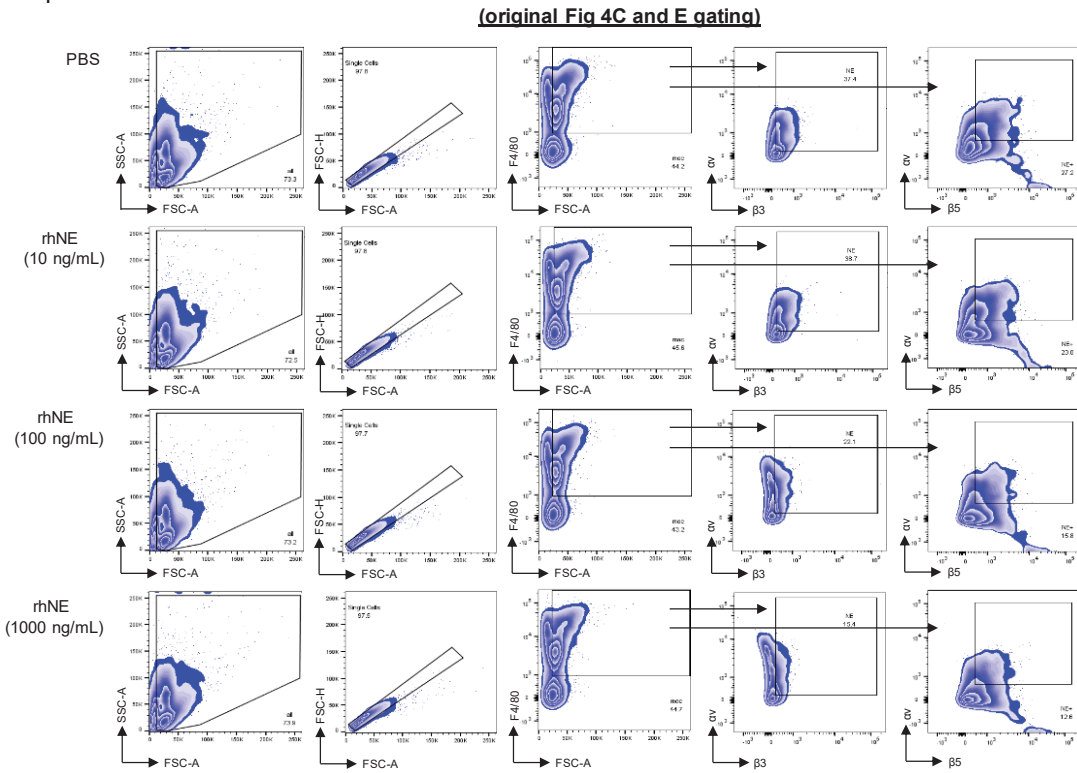

G

(original Fig 4G gating)

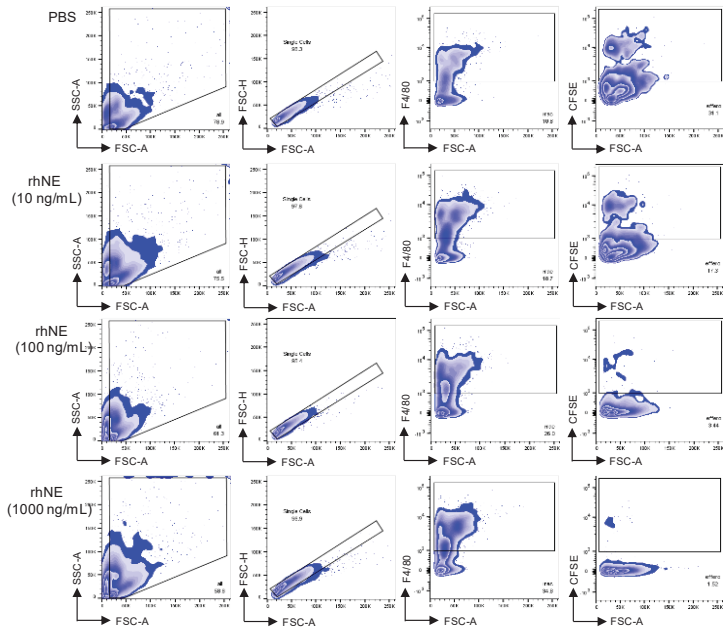

(original Fig 4H gating)

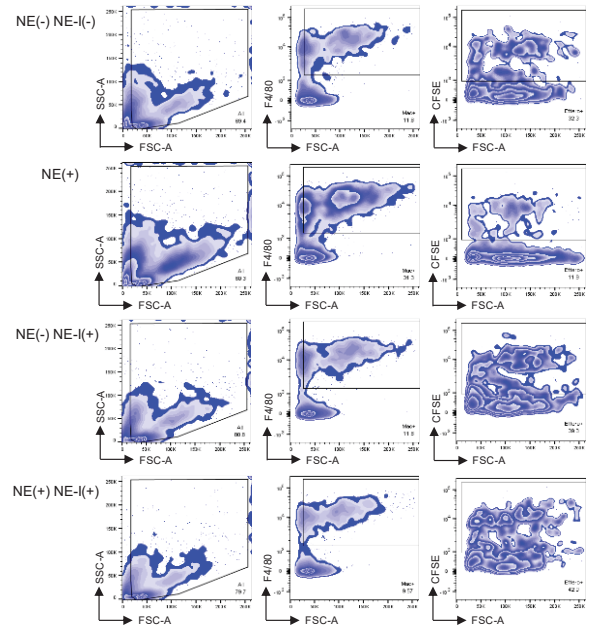



Supplemental Figure 3

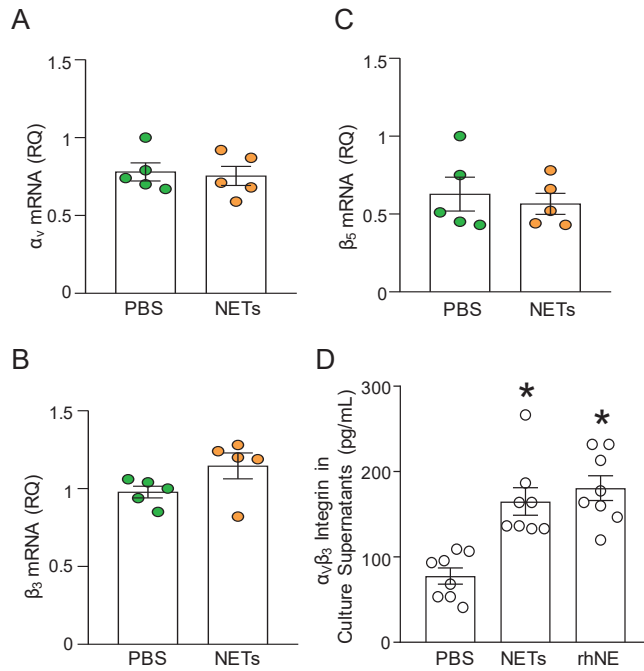

**Supplemental Figure 3: Treatment of macrophages with NETs or rhNE do not alter integrins expression at mRNA levels.**

**(A-C)** A total of  $5 \times 10^5$  peritoneal macrophages from each mouse were stimulated with NETs (1000 ng/mL) or rhNE (1000 ng/mL) for 1 h. After stimulation of the cells with NETs or rhNE, mRNA was isolated and assessed the expression of integrins  $\alpha_v$ ,  $\beta_3$ ,  $\beta_5$  using RTqPCR. Primers used in the PCR were shown in **Supplemental Table-1**.

Amplification and analysis was conducted in a Step One Plus real-time PCR machine (Applied Biosystems). Mouse  $\beta$ -actin mRNA was used as an internal control for amplification and relative gene expression levels were calculated using the  $\Delta\Delta CT$  method. Relative quantity (RQ) of mRNA was expressed. Data were expressed as means  $\pm$  SE (n=5 mice/group, where each dot represents macrophages of one mouse).

The groups were compared by one-way

ANOVA and SNK method. p values between the groups were non-significant. **(D) Treatment of macrophages with NETs or rhNE increases soluble  $\alpha_v\beta_3$  integrin.** Macrophages ( $5 \times 10^5$ ) were treated with NETs (1000 ng/mL) and rhNE (1000 ng/mL) for 20 h. Soluble  $\alpha_v\beta_3$  integrin in the culture supernatant were determined by ELISA (MBS9300860, MyBioSource, San Diego, CA). Data were obtained from 3 independent experiments and expressed as means  $\pm$  SE (n=8 samples/group). The groups were compared by one-way ANOVA and SNK method (\*p<0.05 vs. PBS-treated group).

**Supplemental Table 1: Primer sequences for RTqPCR.**

|                                                               |                              |
|---------------------------------------------------------------|------------------------------|
| <b>Mouse <math>\alpha_v</math>-Integrin<br/>(NM_008402)</b>   |                              |
| Mu- $\alpha_v$ -Integrin-F:                                   | 5'-ATTCGCCGTGGACTTCTTC-3'    |
| Mu- $\alpha_v$ -Integrin-R:                                   | 5'-GACCTCACAGAGGCTCCAAA-3'   |
| <b>Mouse <math>\beta_3</math>-Integrin<br/>(NM_016780)</b>    |                              |
| Mu- $\beta_3$ -Integrin-F:                                    | 5'-GTCATTGGCCTTGCTACTC-3'    |
| Mu- $\beta_3$ -Integrin-R:                                    | 5'-CCCGGTAGGTGATATTGGTG-3'   |
| <b>Mouse <math>\beta_5</math>-Integrin<br/>(NM_001145884)</b> |                              |
| Mu- $\beta_5$ -integrin-F:                                    | 5'-AGTGTGGGATCAGCCAGAAG-3'   |
| Mu- $\beta_5$ -integrin-R:                                    | 5'-GGCCTCAAGGTGAAAGACTG-3'   |
| <b>Mouse <math>\beta</math>-actin<br/>(NM_007393)</b>         |                              |
| Mu- $\beta$ -actin-F:                                         | 5'-CGTGAAAAGATGACCCAGATCA-3' |
| Mu- $\beta$ -actin-R:                                         | 5'-TGGTACGACCAGAGGCATACAG-3' |
